# Supplementary material for: Transcriptome Landscape Variation in the Genus Thymus
Source: PubMed Central journal article supplement (PMC6723042; doi:10.3390/genes10080620), 2019-08-16
Supplement: genes-10-00620-s001.pdf [file genes-10-00620-s001.pdf]

## Supplementary Materials:

**Table S1.** Assembly statistics results of *Thymus* species.

| Tools     | Kmer Size | Species               | Number of contigs | Total size (Mp) | Minimum length (bp) | Maximum length (bp) | Average length (bp) | L50 (bp) |
|-----------|-----------|-----------------------|-------------------|-----------------|---------------------|---------------------|---------------------|----------|
| Trinity   | 25        | <i>T. daenensis</i>   | 91127             | 55.83           | 224                 | 12126               | 614.35              | 819      |
|           |           | <i>T. vulgaris</i>    | 117835            | 68.35           | 224                 | 14141               | 580.1               | 732      |
|           |           | <i>T. lancifolius</i> | 123698            | 73.24           | 224                 | 25032               | 592.09              | 767      |
|           |           | <i>T. persicus</i>    | 85084             | 58.47           | 224                 | 13000               | 687.26              | 999      |
|           |           | <i>T. pubescens</i>   | 96976             | 59.99           | 224                 | 15305               | 618.64              | 818      |
|           |           | <i>T. daenensis</i>   | 70626             | 56.14           | 201                 | 14373               | 794.96              | 1350     |
| Bridger   | 25        | <i>T. vulgaris</i>    | 82450             | 68.78           | 201                 | 17174               | 834.24              | 1414     |
|           |           | <i>T. lancifolius</i> | 89526             | 72.02           | 201                 | 26796               | 804.52              | 1416     |
|           |           | <i>T. persicus</i>    | 67166             | 59.58           | 201                 | 21482               | 887.15              | 1500     |
|           |           | <i>T. pubescens</i>   | 67288             | 56.31           | 201                 | 11592               | 836.99              | 1377     |
|           |           | <i>T. daenensis</i>   | 70235             | 54.72           | 201                 | 13733               | 779.13              | 1316     |
|           |           | <i>T. vulgaris</i>    | 81814             | 67              | 201                 | 15398               | 819.01              | 1396     |
| BinPacker | 27        | <i>T. lancifolius</i> | 89516             | 70.67           | 201                 | 20523               | 789.51              | 1393     |
|           |           | <i>T. persicus</i>    | 66716             | 58.04           | 201                 | 20248               | 869.98              | 1474     |
|           |           | <i>T. pubescens</i>   | 66565             | 54.54           | 201                 | 14125               | 819.48              | 1345     |
|           |           | <i>T. daenensis</i>   | 66591             | 68.45           | 200                 | 14373               | 1028.03             | 1553     |
|           |           | <i>T. vulgaris</i>    | 88953             | 94.52           | 200                 | 17174               | 1062.68             | 1603     |
|           |           | <i>T. lancifolius</i> | 94939             | 98.79           | 200                 | 25544               | 1040.63             | 1634     |
| BinPacker | 25        | <i>T. persicus</i>    | 67179             | 75.24           | 200                 | 21482               | 1120.01             | 1665     |
|           |           | <i>T. pubescens</i>   | 67809             | 73.72           | 200                 | 11592               | 1087.3              | 1574     |



**Table S2.** Velvet/Oases assembly statistics results of *Thymus* species.

| Species/K-mers      | 21                  | 23     | 25     | 27     | 29     | 31     | 33     | 35     | 37     | 39     | 41     | 43     | 45     | 47     | 49     | 51     | 53     | 55     | 57     | 59     | 61     |        |
|---------------------|---------------------|--------|--------|--------|--------|--------|--------|--------|--------|--------|--------|--------|--------|--------|--------|--------|--------|--------|--------|--------|--------|--------|
| <i>T. daenensis</i> | Number of contigs   | 64407  | 63611  | 61900  | 60130  | 56679  | 54699  | 53888  | 53499  | 52686  | 52284  | 51817  | 51422  | 51103  | 50413  | 50156  | 50024  | 49953  | 49739  | 49921  | 49370  | 48985  |
|                     | Total size (Mp)     | 56.31  | 56.61  | 55.16  | 54.64  | 51.09  | 48.69  | 47.78  | 47.29  | 45.93  | 45.6   | 44.67  | 43.83  | 43.06  | 42.43  | 41.6   | 41.42  | 41.24  | 41.13  | 40.4   | 39.48  | 38.43  |
|                     | Average length (bp) | 874.36 | 890.06 | 891.18 | 908.85 | 901.47 | 890.32 | 886.68 | 884    | 871.8  | 872.3  | 862.11 | 852.39 | 842.64 | 841.81 | 829.46 | 828.05 | 825.73 | 827.11 | 809.42 | 799.68 | 784.71 |
|                     | N50 length (bp)     | 1327   | 1343   | 1358   | 1384   | 1383   | 1375   | 1369   | 1364   | 1345   | 1341   | 1326   | 1310   | 1296   | 1305   | 1284   | 1285   | 1284   | 1295   | 1268   | 1257   | 1230   |
|                     | Number of contigs   | 88534  | 86637  | 84537  | 80270  | 74483  | 71518  | 70248  | 69325  | 68744  | 68430  | 67662  | 66852  | 66980  | 66396  | 66031  | 65765  | 65972  | 65585  | 65698  | 64711  | 64646  |
| <i>T. vulgaris</i>  | Total size (Mp)     | 73.57  | 73.65  | 71.69  | 70.53  | 66.04  | 62.09  | 61.12  | 60.42  | 59.59  | 59.48  | 58.1   | 57.85  | 57.59  | 56.74  | 55.77  | 55.65  | 55.8   | 55.49  | 55.35  | 54.08  | 52.68  |
|                     | Average length (bp) | 831.04 | 852.79 | 848.05 | 878.72 | 886.71 | 868.26 | 870.08 | 871.59 | 866.91 | 869.31 | 858.76 | 858.76 | 859.87 | 854.59 | 844.68 | 846.2  | 845.88 | 846.13 | 842.61 | 835.75 | 814.93 |
|                     | N50 length (bp)     | 1259   | 1289   | 1286   | 1338   | 1364   | 1333   | 1345   | 1346   | 1347   | 1348   | 1334   | 1334   | 1339   | 1331   | 1323   | 1332   | 1342   | 1362   | 1353   | 1352   | 1323   |
|                     | Number of contigs   | 99808  | 98848  | 95024  | 91049  | 83022  | 80859  | 79882  | 78650  | 78013  | 77393  | 76437  | 76296  | 75789  | 74930  | 74324  | 74274  | 74090  | 74063  | 74088  | 74037  | 73396  |

|                    |                     |        |        |        |        |        |        |        |        |        |        |        |        |        |        |        |        |        |        |        |        |        |      |
|--------------------|---------------------|--------|--------|--------|--------|--------|--------|--------|--------|--------|--------|--------|--------|--------|--------|--------|--------|--------|--------|--------|--------|--------|------|
| <i>T. persicus</i> | Total size (Mp)     | 84.08  | 85.41  | 84.11  | 81.83  | 74.21  | 71.58  | 70.67  | 69.39  | 69.04  | 68.43  | 67.61  | 67.22  | 67     | 65.82  | 64.83  | 64.51  | 64.6   | 64.47  | 63.88  | 62.72  | 61.4   |      |
|                    | average length (bp) | 842.5  | 864.1  | 885.17 | 898.8  | 893.91 | 885.26 | 884.73 | 882.35 | 885.08 | 884.21 | 884.54 | 881.14 | 884.08 | 878.49 | 872.38 | 868.61 | 871.99 | 870.59 | 862.3  | 850.64 | 836.63 |      |
|                    | N50 length (bp)     | 1303   | 1334   | 1369   | 1405   | 1420   | 1416   | 1416   | 1410   | 1415   | 1420   | 1420   | 1413   | 1427   | 1412   | 1409   | 1411   | 1421   | 1421   | 1429   | 1425   | 1414   | 1394 |
|                    | Number of contigs   | 69437  | 64453  | 65231  | 61548  | 57545  | 57149  | 56241  | 55495  | 55238  | 55154  | 55206  | 54830  | 54804  | 54662  | 54427  | 54512  | 54655  | 54986  | 54966  | 54471  | 54769  |      |
|                    | Total size (Mp)     | 61.25  | 62.21  | 64.16  | 60.5   | 56.49  | 56.36  | 55.43  | 54.48  | 53.42  | 53.13  | 52.55  | 52.38  | 51.86  | 51.02  | 50.7   | 50.58  | 50.75  | 50.5   | 50.19  | 49.09  | 48.11  |      |
|                    | average length (bp) | 882.15 | 965.3  | 983.72 | 983.03 | 981.78 | 986.33 | 985.72 | 981.86 | 967.25 | 963.46 | 952.04 | 955.43 | 946.38 | 933.45 | 931.57 | 928.05 | 928.69 | 919.98 | 913.14 | 901.23 | 878.49 |      |
|                    | N50 length (bp)     | 1357   | 1357   | 1498   | 1504   | 1502   | 1508   | 1502   | 1503   | 1479   | 1478   | 1457   | 1476   | 1460   | 1447   | 1443   | 1440   | 1449   | 1444   | 1434   | 1426   | 1401   | 1375 |
|                    | Number of contigs   | 61109  | 58280  | 55685  | 54687  | 51719  | 50534  | 49772  | 49324  | 48909  | 48511  | 48245  | 48042  | 48199  | 47688  | 47783  | 47850  | 48078  | 48105  | 48491  | 48306  | 47938  |      |
|                    | Total size (Mp)     | 53.96  | 52.5   | 50.44  | 49.72  | 47.61  | 45.99  | 45.06  | 44.35  | 43.93  | 43.17  | 42.81  | 42.21  | 41.61  | 41.19  | 40.78  | 40.8   | 40.89  | 40.63  | 40.16  | 39.71  | 38.71  |      |
|                    | average length (bp) | 883.03 | 900.82 | 905.86 | 909.58 | 920.61 | 910.12 | 905.52 | 899.28 | 898.3  | 890.02 | 887.44 | 878.68 | 863.43 | 863.82 | 853.59 | 852.75 | 850.69 | 844.61 | 828.27 | 822.05 | 807    |      |
| N50                | 130                 | 133    | 135    | 135    | 138    | 137    | 136    | 135    | 135    | 134    | 134    | 133    | 130    | 130    | 129    | 129    | 130    | 129    | 127    | 126    | 125    |        |      |



**Table S3.** The number of full length transcripts for three assemblers and five species.

| Percent length coverage |           | 100  | 90   | 80   | 70  | 60   | 50   |
|-------------------------|-----------|------|------|------|-----|------|------|
| <i>T. daenensis</i>     | Trinity   | 3082 | 1114 | 883  | 866 | 905  | 1009 |
|                         | Bridger   | 3374 | 1146 | 825  | 769 | 794  | 851  |
|                         | BinPacker | 3405 | 1156 | 842  | 777 | 791  | 826  |
| <i>T. vulgaris</i>      | Trinity   | 3234 | 1217 | 1034 | 976 | 1005 | 1114 |
|                         | Bridger   | 3730 | 1258 | 901  | 812 | 841  | 840  |
|                         | BinPacker | 3806 | 1276 | 926  | 825 | 847  | 852  |
| <i>T. lancifolius</i>   | Trinity   | 3269 | 1212 | 1044 | 963 | 993  | 1096 |
|                         | Bridger   | 3662 | 1239 | 910  | 819 | 866  | 861  |
|                         | BinPacker | 3722 | 1264 | 934  | 839 | 881  | 872  |
| <i>T. persicus</i>      | Trinity   | 3549 | 1211 | 928  | 817 | 837  | 873  |
|                         | Bridger   | 3778 | 1204 | 872  | 729 | 728  | 712  |
|                         | BinPacker | 3815 | 1212 | 905  | 731 | 738  | 694  |
| <i>T. pubescens</i>     | Trinity   | 3445 | 1257 | 968  | 852 | 943  | 962  |
|                         | Bridger   | 3544 | 1199 | 864  | 720 | 779  | 802  |
|                         | BinPacker | 3603 | 1198 | 877  | 752 | 791  | 807  |

**Table S4.** The contigs number of eleven genes involved in thymol and other monoterpene biosynthesis identified in *Thymus* transcriptomes.

| TF families        | <i>T. daenensis</i> | <i>T. vulgaris</i> | <i>T. lancifolius</i> | <i>T. persicus</i> | <i>T. pubescens</i> |
|--------------------|---------------------|--------------------|-----------------------|--------------------|---------------------|
| <b>bHLH</b>        | 4630                | 6189               | 6533                  | 4479               | 4631                |
| <b>NAC</b>         | 2241                | 3234               | 3015                  | 2316               | 2458                |
| <b>MYB_related</b> | 2232                | 3198               | 3099                  | 2587               | 2649                |
| <b>ARF</b>         | 2092                | 2018               | 2416                  | 1796               | 1661                |
| <b>WRKY</b>        | 2090                | 3011               | 2582                  | 2246               | 2666                |
| <b>ERF</b>         | 1672                | 2367               | 2313                  | 1812               | 2108                |
| <b>C2H2</b>        | 1583                | 2269               | 2449                  | 1732               | 1768                |
| <b>C3H</b>         | 1351                | 1855               | 1708                  | 1458               | 1516                |
| <b>FAR1</b>        | 1264                | 1752               | 1644                  | 1315               | 1346                |
| <b>B3</b>          | 1257                | 1773               | 1769                  | 1494               | 1372                |
| <b>HD-ZIP</b>      | 400                 | 520                | 499                   | 410                | 412                 |
| <b>G2-like</b>     | 78                  | 86                 | 103                   | 99                 | 76                  |
| <b>GRAS</b>        | 78                  | 86                 | 103                   | 99                 | 76                  |
| <b>GATA</b>        | 70                  | 77                 | 92                    | 88                 | 68                  |
| <b>TALE</b>        | 56                  | 62                 | 74                    | 70                 | 54                  |
| <b>LBD</b>         | 48                  | 53                 | 63                    | 59                 | 46                  |
| <b>TCP</b>         | 44                  | 48                 | 58                    | 54                 | 42                  |
| <b>SBP</b>         | 36                  | 40                 | 48                    | 44                 | 34                  |
| <b>AP2</b>         | 35                  | 39                 | 46                    | 42                 | 33                  |
| <b>CO-like</b>     | 31                  | 34                 | 41                    | 37                 | 29                  |
| <b>HB-other</b>    | 30                  | 33                 | 40                    | 36                 | 28                  |
| <b>NF-YB</b>       | 30                  | 33                 | 40                    | 36                 | 28                  |
| <b>MIKC_MADS</b>   | 26                  | 29                 | 34                    | 30                 | 24                  |
| <b>Nin-like</b>    | 26                  | 29                 | 34                    | 30                 | 24                  |
| <b>YABBY</b>       | 26                  | 29                 | 34                    | 30                 | 24                  |

|             |    |    |    |    |    |
|-------------|----|----|----|----|----|
| Dof         | 24 | 26 | 32 | 28 | 22 |
| HSF         | 24 | 26 | 32 | 28 | 22 |
| NF-YC       | 23 | 25 | 30 | 26 | 21 |
| CPP         | 22 | 24 | 29 | 25 | 20 |
| E2F/DP      | 20 | 22 | 26 | 22 | 18 |
| SRS         | 20 | 22 | 26 | 22 | 18 |
| WOX         | 20 | 22 | 26 | 22 | 18 |
| ARR-B       | 19 | 21 | 25 | 21 | 17 |
| GRF         | 19 | 21 | 25 | 21 | 17 |
| BES1        | 17 | 19 | 22 | 18 | 15 |
| BBR-BPC     | 16 | 18 | 21 | 17 | 14 |
| CAMTA       | 15 | 17 | 20 | 16 | 13 |
| NF-YA       | 14 | 15 | 18 | 14 | 12 |
| GeBP        | 11 | 12 | 15 | 11 | 9  |
| LSD         | 11 | 12 | 15 | 11 | 9  |
| STAT        | 11 | 12 | 15 | 11 | 9  |
| DBB         | 9  | 10 | 12 | 8  | 7  |
| M-type_MADS | 8  | 9  | 11 | 7  | 6  |
| NF-X1       | 6  | 7  | 8  | 4  | 4  |
| ZF-HD       | 5  | 6  | 7  | 3  | 3  |
| RAV         | 4  | 4  | 5  | 1  | 2  |
| S1Fa-like   | 4  | 4  | 5  | 1  | 2  |
| VOZ         | 4  | 4  | 5  | 1  | 2  |
| Whirly      | 4  | 4  | 5  | 1  | 2  |
| EIL         | 3  | 3  | 4  | 0  | 1  |
| HRT-like    | 3  | 3  | 4  | 0  | 1  |
| HB-PHD      | 1  | 1  | 1  | -  | -  |
| SAP         | 1  | 1  | 1  | -  | -  |

**Table S5.** The contigs number of eleven genes involved in thymol and other monoterpene biosynthesis identified in *Thymus* transcriptomes

| Genes name   | <i>T. daenensis</i> | <i>T. vulgaris</i> | <i>T. lancifolius</i> | <i>T. persicus</i> | <i>T. pubescence</i> |
|--------------|---------------------|--------------------|-----------------------|--------------------|----------------------|
| DXR          | 9                   | 4                  | 8                     | 6                  | 8                    |
| DXS          | 12                  | 14                 | 16                    | 9                  | 15                   |
| MCT          | 2                   | 1                  | 4                     | 1                  | 1                    |
| CMK          | 3                   | 2                  | 1                     | 4                  | 2                    |
| MDS          | 1                   | 2                  | 1                     | 2                  | 4                    |
| HDS          | 9                   | 9                  | 12                    | 15                 | 18                   |
| HDR          | 20                  | 22                 | 9                     | 17                 | 20                   |
| IDI          | 3                   | 3                  | 5                     | 10                 | 6                    |
| GGPS         | 6                   | 7                  | 4                     | 9                  | 9                    |
| GDS          | 1                   | 2                  | 2                     | 3                  | 2                    |
| TPS          | 15                  | 25                 | 9                     | 21                 | 9                    |
| <b>Total</b> | <b>81</b>           | <b>91</b>          | <b>80</b>             | <b>97</b>          | <b>94</b>            |

**Table S6.** Lengths of genes involved in thymol and other monoterpene biosynthesis identified in *Thymus* transcriptomes

| Gene<br>s<br>name      | <i>T.</i><br><i>daenensi</i><br>s | <i>T.</i><br><i>vulgari</i><br>s | <i>T.</i><br><i>lancifoliu</i><br>s | <i>T.</i><br><i>persicu</i><br>s | <i>T.</i><br><i>pubescenc</i><br>e | <i>Salvia</i><br><i>multiorrhiz</i><br>a | <i>T.</i><br><i>vulgari</i><br>s | <i>T.</i><br><i>caespititiu</i><br>s |
|------------------------|-----------------------------------|----------------------------------|-------------------------------------|----------------------------------|------------------------------------|------------------------------------------|----------------------------------|--------------------------------------|
| <b>DXR</b>             | 1422                              | 1422                             | 1422                                | 1422                             | 1422                               | 1425                                     | -                                | -                                    |
| <b>DXS</b>             | 2122                              | 2122                             | 2122                                | 2122                             | 2122                               | 2145                                     | -                                | -                                    |
| <b>MCT</b>             | 915                               | 915                              | 910                                 | 915                              | 915                                | 915                                      | -                                | -                                    |
| <b>CMK</b>             | 1188                              | 1188                             | 1188                                | 1188                             | 1188                               | 1191                                     | -                                | -                                    |
| <b>MDS</b>             | 705                               | 705                              | 705                                 | 705                              | 705                                | 705                                      | -                                | -                                    |
| <b>HDS</b>             | 2229                              | 2229                             | 2229                                | 2229                             | 2229                               | 2229                                     | -                                | -                                    |
| <b>HDR</b>             | 1389                              | 1389                             | 1389                                | 1389                             | 1389                               | 1392                                     | -                                | -                                    |
| <b>IDI</b>             | 862                               | 906                              | 731                                 | 862                              | 862                                | 918                                      | -                                | -                                    |
| <b>GDS</b>             | 1275                              | 1275                             | 1167                                | 816                              | 1275                               | 1275                                     | -                                | -                                    |
| <b>GGP</b><br><b>S</b> | 1085                              | 1085                             | 1085                                | 1085                             | 1085                               | 1095                                     | -                                | -                                    |
| <b>TPS2</b>            | 1791                              | 1615                             | 1231                                | 1733                             | 1197                               | -                                        | 1791                             |                                      |
| <b>TPS3</b>            | 1154                              | 1788                             | 1788                                | 1788                             | 1618                               | -                                        | 1788                             |                                      |
| <b>TPS4</b>            | 1654                              | 1665                             | 1639                                | 1060                             | 1665                               | -                                        | -                                | 1665                                 |
| <b>TPS5</b>            | 1747                              | 1747                             | 1747                                | 1747                             | 1747                               | -                                        | 1747                             | -                                    |

**Table S7.** The unigenes subjected to positive selection

| <i>T. daenensis</i>                                                           | <i>T. lancifolius</i>                       | <i>T. persicus</i>                                               | <i>T. pubescens</i>                     |
|-------------------------------------------------------------------------------|---------------------------------------------|------------------------------------------------------------------|-----------------------------------------|
| Histidine kinase 5                                                            | ABC transporter G family member 6           | ABC transporter I family member 1                                | Probable anion transporter 4            |
| AT-hook motif nuclear-localized protein 8                                     | AT-hook motif nuclear-localized protein S10 | E3 ubiquitin-protein ligase ATL31                                | L-ascorbate peroxidase                  |
| Probable dolichyl pyrophosphate Glc1Man9GlcNAc2 alpha-1,3-glucosyltransferase | Probable anion transporter 4                | Berberine bridge enzyme-like 21                                  | Actin-related protein 3                 |
| Probable RNA-binding protein ARP1                                             | Anaphase-promoting complex subunit 1        | Transcription factor bHLH106                                     | RING-H2 finger protein ATL38            |
| Histone-lysine N-methyltransferase ATXR6                                      | Transcription factor bHLH110                | Chaperone protein ClpB                                           | E3 ubiquitin-protein ligase BRE1-like 2 |
| Probable BOI-related E3 ubiquitin-protein ligase 3                            | Transcription factor BPE, (bHLH 31)         | Cyclic nucleotide-gated ion channel 2                            | Cytochrome P450 71A8                    |
| Chaperone protein ClpB1                                                       | Serine/threonine-protein kinase BRI1-like 2 | Furcadin hydrolase                                               | Receptor protein-tyrosine kinase CEPR1  |
| CLP protease regulatory subunit CLPX2                                         | Histone-lysine N-methyltransferase CLF      | LanC-like protein GCL2                                           | Cyclic nucleotide-gated ion channel 2   |
| Protein CLT1, chloroplastic                                                   | CLP protease regulatory subunit CLPX2       | Lysophospholipid acyltransferase LPEAT2                          | Protein CONTINUOUS VASCULAR RING 1      |
| Glucan endo-1,3-beta-glucosidase 5                                            | Protein CLT1, chloroplastic                 | Probable mediator of RNA polymerase II transcription subunit 26b | Glucan endo-1,3-beta-glucosidase 6      |
| F-box protein                                                                 | Ubiquinone biosynthesis O-methyltransferase | Pentatricopeptide repeat-containing protein                      | F-box protein                           |



|                                                                    |                                                                      |                                                              |                                                          |
|--------------------------------------------------------------------|----------------------------------------------------------------------|--------------------------------------------------------------|----------------------------------------------------------|
| Gibberellin 20 oxidase 2                                           | Putative protease Do-like 14                                         | Serine/threonine-protein phosphatase 7                       | Heat shock 70 kDa protein 8                              |
| ARF guanine-nucleotide exchange factor GNOM                        | Zinc finger BED domain-containing protein DAYSLEEPER                 | Protein NRT1/ PTR FAMILY 7.3                                 | Probable serine/threonine protein kinase IRE             |
| Copper-transporting ATPase HMA4                                    | Elongator complex protein 1                                          | Ribonuclease 3-like protein 2                                | Ent-kaurenoic acid oxidase 2                             |
| Kinesin-like protein KIN-12B                                       | Embryogenesis-associated protein EMB8                                | NAD-dependent protein deacetylase SRT1                       | 3-ketoacyl-CoA synthase 2                                |
| Transcription factor KUA1 (Myb-related protein H)                  | 1-phosphatidylinositol-3-phosphate 5-kinase FAB1B                    | F-box protein SKIP23                                         | Protein LAZ1 homolog 2                                   |
| Transcription factor LHW (BHLH transcription factor delta)         | F-box protein                                                        | Tubulin-folding cofactor D                                   | L-type lectin-domain containing receptor kinase VII.1    |
| Midasin (AtMDN1)                                                   | L-gulonolactone oxidase 3                                            | Mitochondrial import inner membrane translocase subunit TIM8 | RNA cytidine acetyltransferase 1                         |
| NADH dehydrogenase 1 alpha subcomplex subunit 13-B                 | Nuclear pore complex protein GP210                                   | Probable LRR receptor-like serine/threonine-protein kinase   | NADH-ubiquinone oxidoreductase chain 6                   |
| Protein phosphatase 2C 29                                          | Type II inositol polyphosphate 5-phosphatase 15                      | Probable inactive receptor kinase                            | O-fucosyltransferase 2                                   |
| GPI mannosyltransferase 1                                          | Probable LRR receptor-like serine/threonine-protein kinase IRK       | Protein YLS3 (Protein YELLOW-LEAF-SPECIFIC GENE 3)           | OTU domain-containing protein                            |
| Pentatricopeptide repeat-containing protein                        | G-type lectin S-receptor-like serine/threonine-protein kinase LECRK1 |                                                              | Pectinesterase inhibitor 10                              |
| Respiratory burst oxidase homolog protein C                        | Probable 1-acyl-sn-glycerol-3-phosphate acyltransferase 4            |                                                              | Putative pentatricopeptide repeat-containing protein     |
| G-type lectin S-receptor-like serine/threonine-protein kinase RLK1 | MADS-box transcription factor 6                                      |                                                              | Pentatricopeptide repeat-containing protein              |
| Receptor-like protein kinase 5                                     | Mediator of RNA polymerase II transcription subunit 16               |                                                              | Pentatricopeptide repeat-containing protein              |
| Disease resistance RPP8-like protein 3                             | Plastid division protein PDV1                                        |                                                              | Glucosidase 2 subunit beta (Glucosidase II subunit beta) |
| Subtilisin-like protease SBT5.4                                    | Pentatricopeptide repeat-containing protein                          |                                                              | Putative late blight resistance protein homolog R1A-6    |
| Ethylene-responsive transcription factor SHINE 2                   | PRA1 family protein B4 (AtPRA1.B4)                                   |                                                              | DNA repair protein recA homolog 3                        |
| Single-stranded DNA-binding protein                                | Receptor-like cytosolic serine/threonine-protein kinase RBK2         |                                                              | Remorin 1.4                                              |
| Thioredoxin-like 3-3 (Thioredoxin-like 1)                          | SCARECROW-LIKE protein 7                                             |                                                              | Probable disease resistance protein RXW24L               |

|                                                                     |                                                                                                                                                                 |                                                                                         |
|---------------------------------------------------------------------|-----------------------------------------------------------------------------------------------------------------------------------------------------------------|-----------------------------------------------------------------------------------------|
| Beta-D-glucosyl crocetin beta-1,6-glucosyltransferase               | Potassium channel SKOR (Stelar K(+) outward rectifying channel)                                                                                                 | Tryptophan--tRNA ligase                                                                 |
| Extra-large guanine nucleotide-binding protein 1 WEB family protein | SEC1 family transport protein SLY1<br>Protein trichome birefringence-like 16                                                                                    | Thylakoid luminal protein TL20.3,<br>Ubiquitin-like domain-containing CTD phosphatase   |
| Probable receptor-like serine/threonine-protein kinase              | Ubiquitin carboxyl-terminal hydrolase 3<br><br>Vesicle-associated membrane protein 711<br>Vacuolar-processing enzyme (VPE)<br>Probable inactive receptor kinase | Leucine-rich repeat receptor-like serine/threonine-protein kinase<br>PHD finger protein |

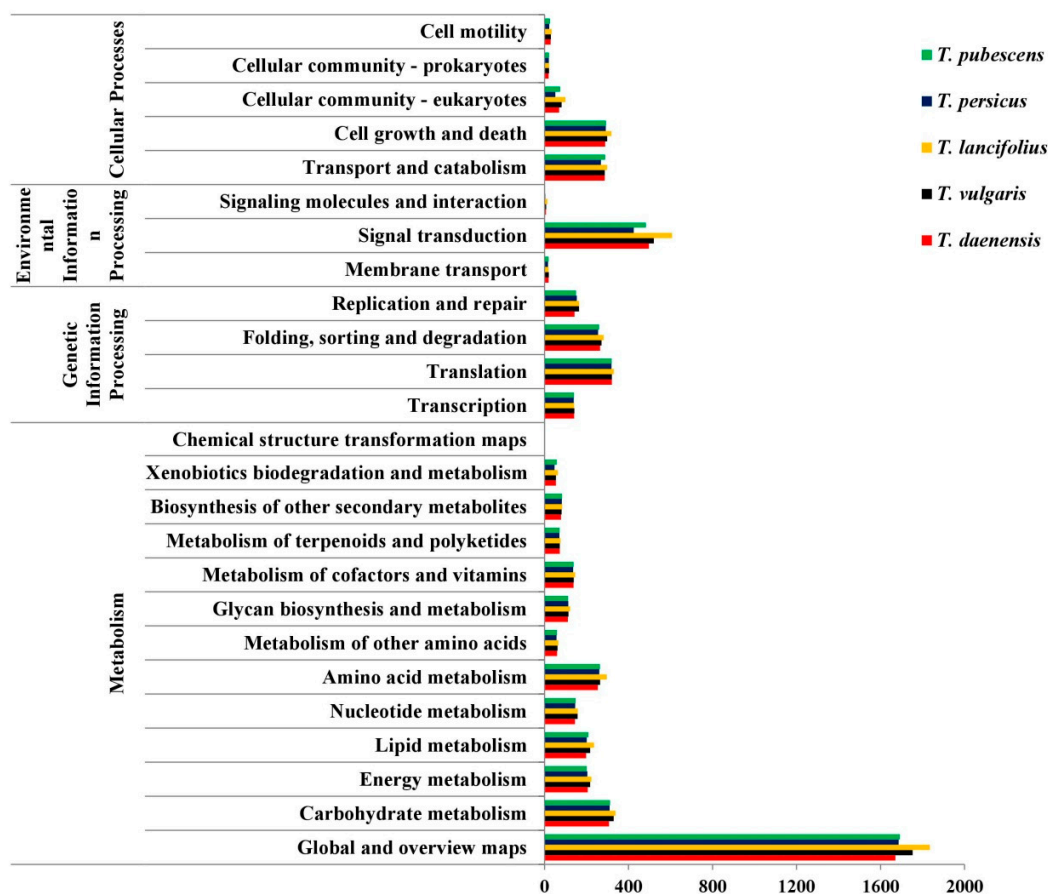

Figure S1. KEGG classification of unigenes for *Thymus* transcriptomes.

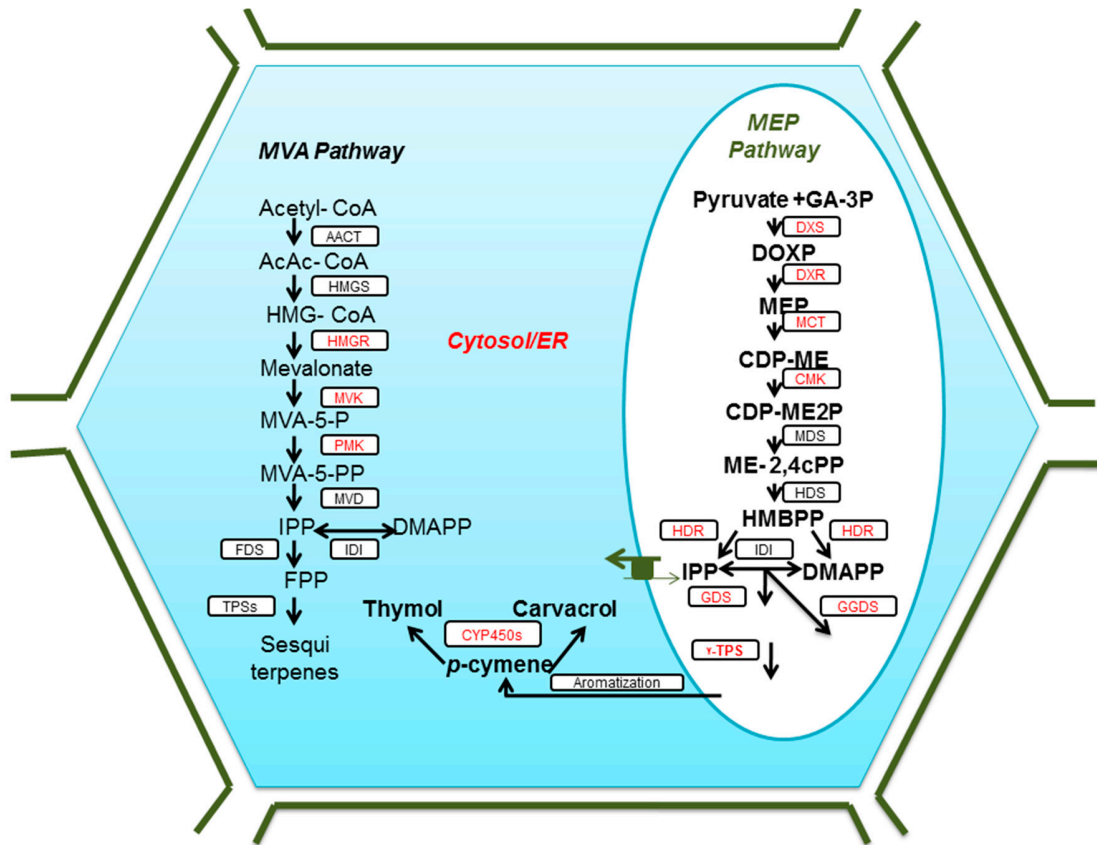

Figure S2. Schematic representation of thymol and carvacrol biosynthetic pathway.

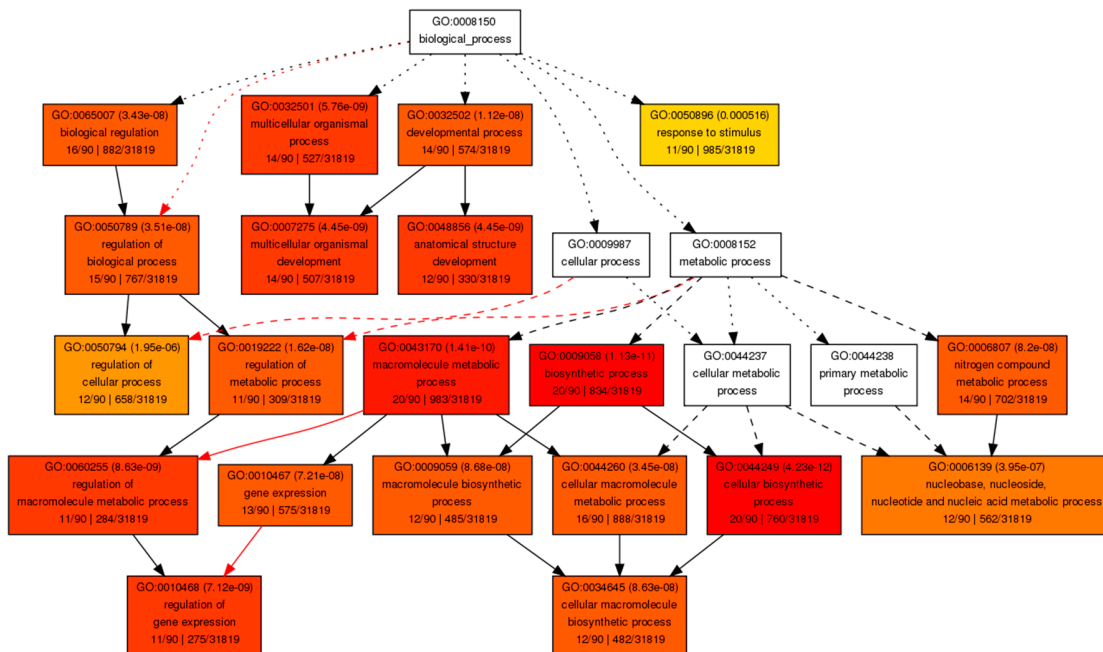

Figure S3. GO enrichment of PSGs related to ecological adaptation in *Thymus* species.

Tree scale: 0.1

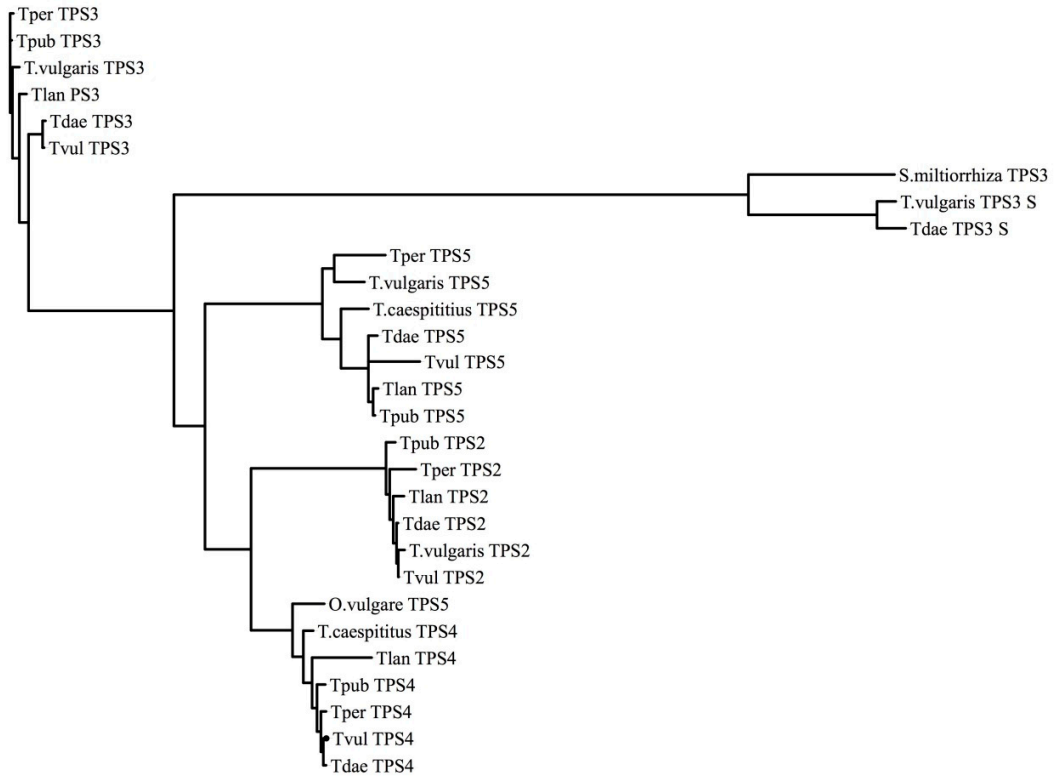

**Figure S4.** Maximum likelihood phylogeny of putative TPS genes in *Thymus* species.
